# Supplementary material for: Cyclopia intermedia (Honeybush) Induces Uncoupling Protein 1 and Peroxisome Proliferator-Activated Receptor Alpha Expression in Obese Diabetic Female db/db Mice
Source: MDPI journal article supplement (doi:10.3390/ijms24043868), 2023-02-15
Supplement: s1 [file s1]

## Supplementary Material

# ***Cyclopia intermedia* (honeybush) induces uncoupling protein 1 and peroxisome proliferator-activated receptor alpha expression in obese diabetic female db/db mice**

Babalwa Unice Jack <sup>1,\*</sup>, Pritika Ramharack <sup>1,2</sup>, Christiaan Malherbe <sup>3,†</sup>, Kwazi Gabuza <sup>1</sup>, Elizabeth Joubert <sup>3,4</sup> and Carmen Pheiffer <sup>1,5,6</sup>

<sup>1</sup> Biomedical Research and Innovation Platform, South African Medical Research Council, Tygerberg, Cape Town 7505, South Africa

<sup>2</sup> Pharmaceutical Sciences, School of Health Sciences, University of KwaZulu-Natal, Westville Campus, Durban 4001, South Africa

<sup>3</sup> Plant Bioactives Group, Post-Harvest and Agro-Processing Technologies, Agricultural Research Council (ARC), Infruitec-Nietvoorbij, Stellenbosch 7599, South Africa

<sup>4</sup> Department of Food Science, University of Stellenbosch, Matieland, Stellenbosch 7602, South Africa

<sup>5</sup> Centre for Cardio-Metabolic Research in Africa (CARMA), Division of Medical Physiology, Faculty of Medicine and Health Sciences, University of Stellenbosch, Tygerberg, Cape Town 7505, South Africa

<sup>6</sup> Department of Obstetrics and Gynaecology, Faculty of Health Sciences, University of Pretoria, Pretoria 0001, South Africa

\* Correspondence: babalwa.jack@mrc.ac.za; Tel.: +27-219-380336

† Current address: Analytical Services, Afriplex Pty Ltd, Paarl 7620, South Africa

## Validation of molecular docking of PPAR $\alpha$

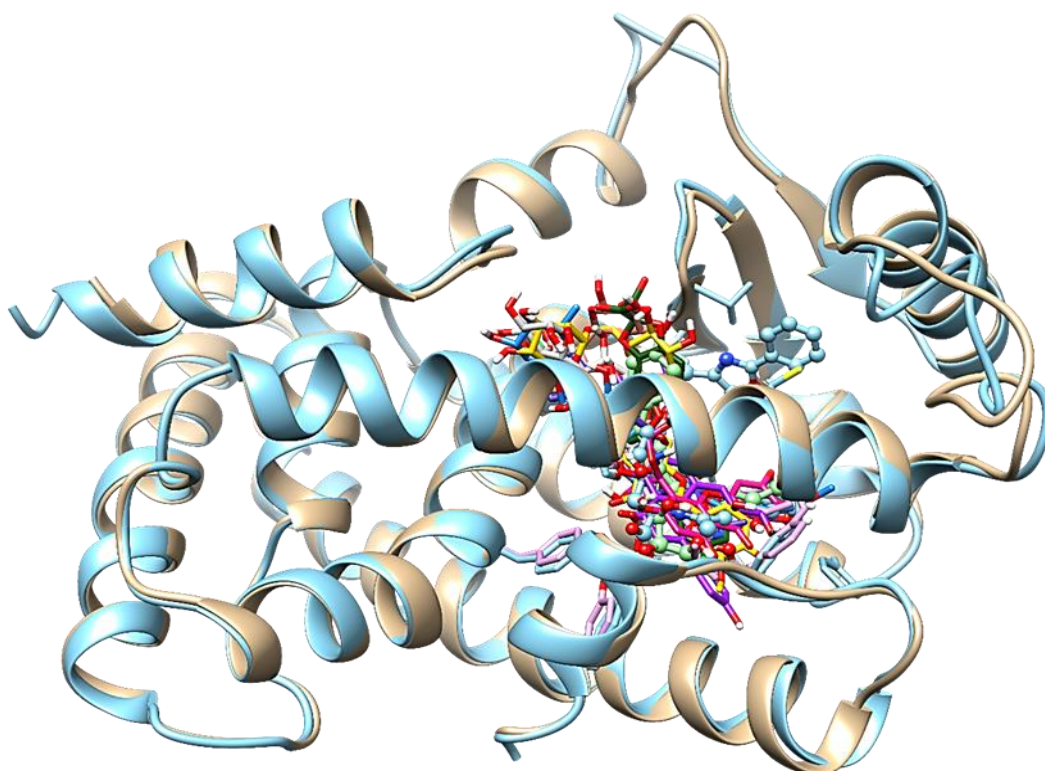

**Figure S1:** Validation of molecular docking of PPAR $\alpha$  by superimposing the complexed models with the crystal template structures. All ligands docked at the same active site to the complexed crystal structures (Blue ribbon: 3DZY- ball and stick ligand, Green: 1K7L- ball and stick ligand, Tan: PPAR $\alpha$  model).
